# Supplementary material for: Methylation Pattern Mediated by m6A Regulator and Tumor Microenvironment Invasion in Lung Adenocarcinoma
Source: PubMed Central journal article supplement (PMC8756160; doi:10.1155/2022/2930310), 2022-01-05

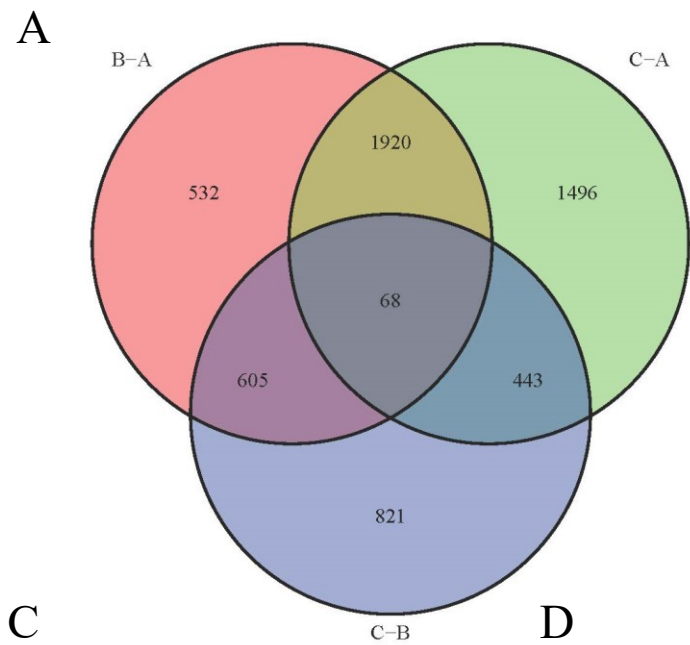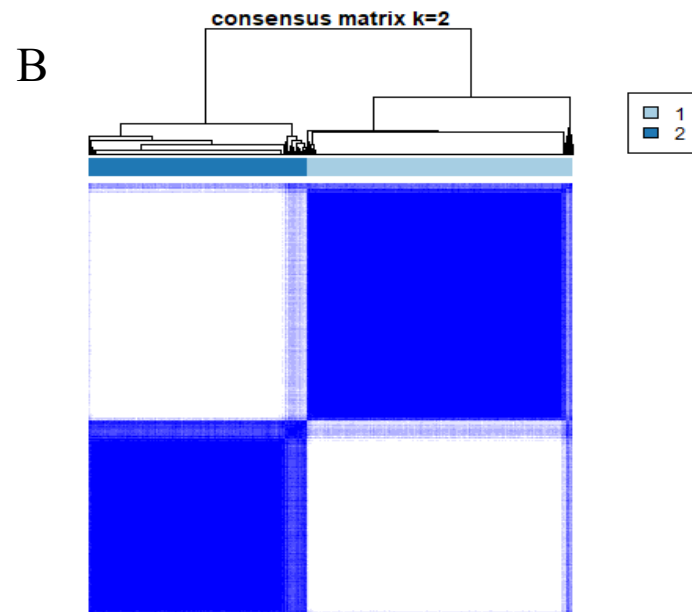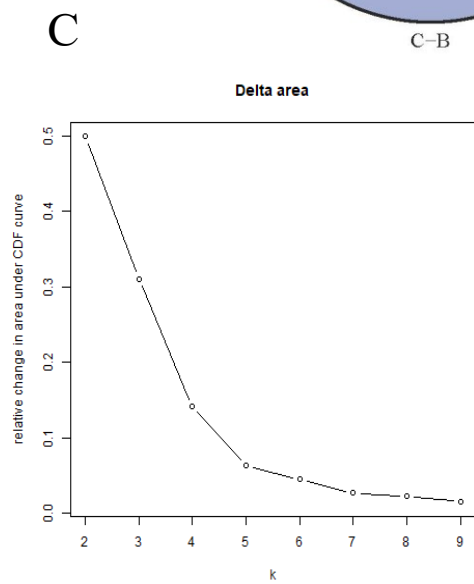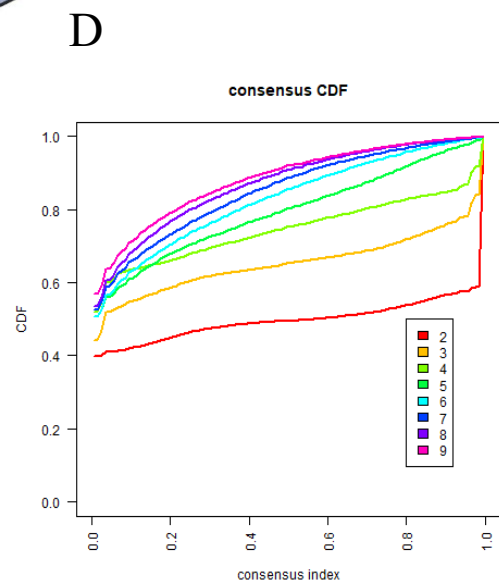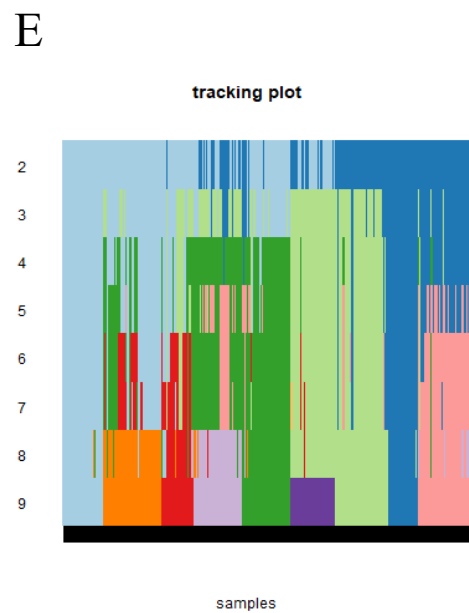

Supplement: 2930310.f6.pdf [file 2930310.f6.pdf]
