# Supplementary material for: Methylation Pattern Mediated by m6A Regulator and Tumor Microenvironment Invasion in Lung Adenocarcinoma
Source: Hindawi journal article supplement (doi:10.1155/2022/2930310), 2022-01-01

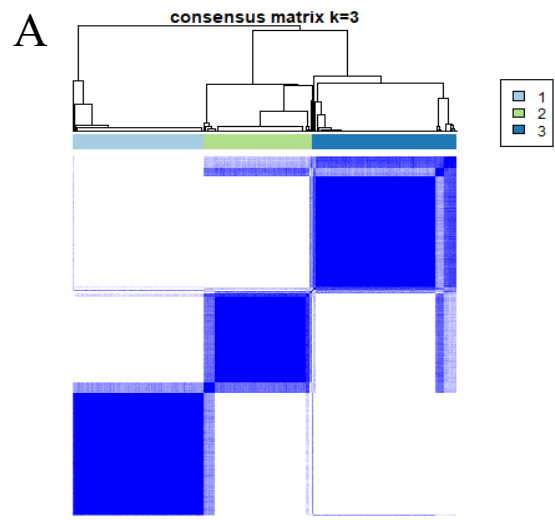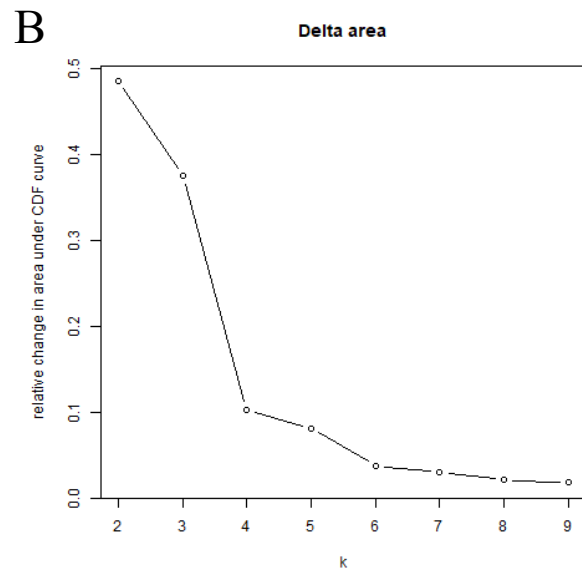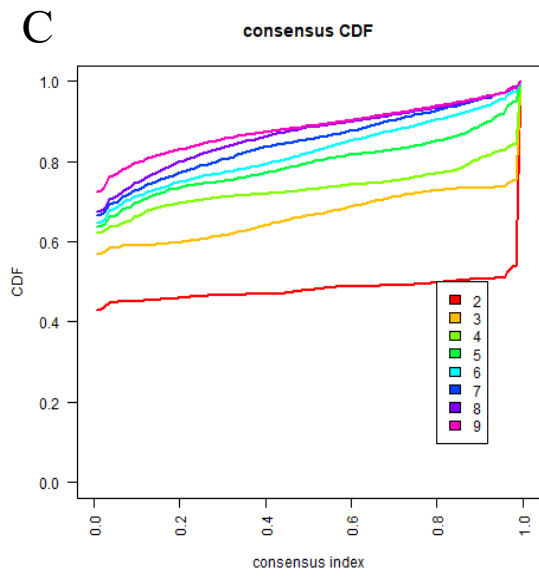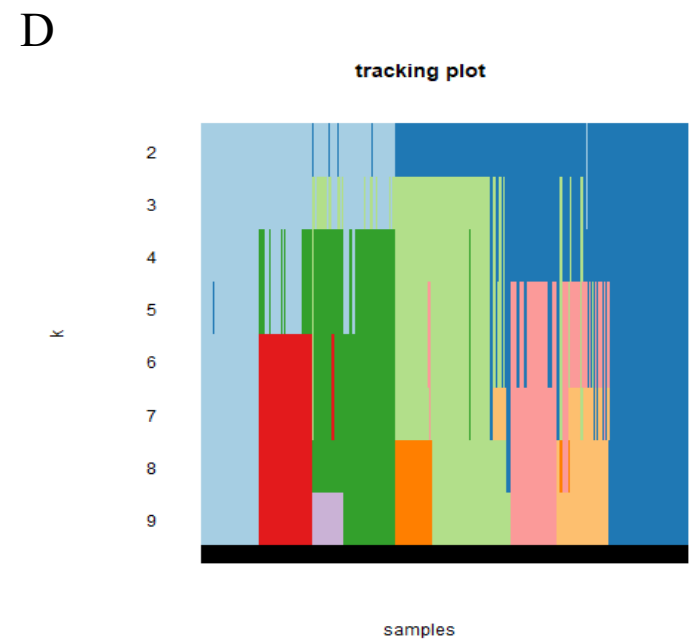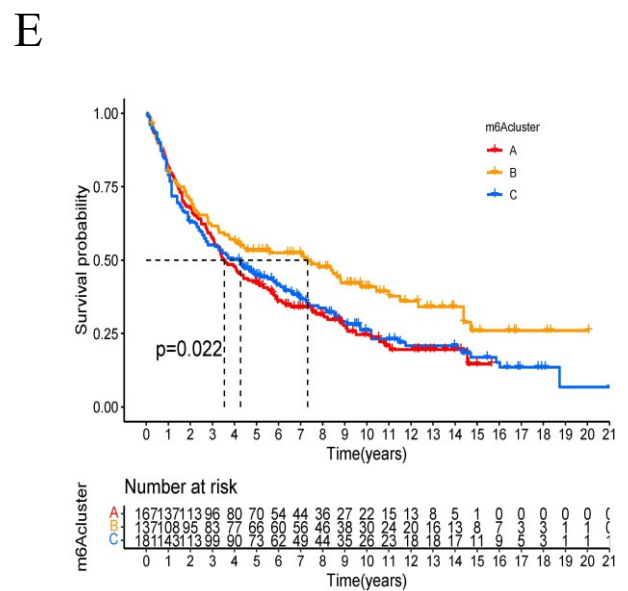

Supplement: f4 [file 2930310.f4.pdf]
