# Supplementary material for: Methylation Pattern Mediated by m6A Regulator and Tumor Microenvironment Invasion in Lung Adenocarcinoma
Source: Oxid Med Cell Longev. 2022 Jan 5;2022:2930310. doi: 10.1155/2022/2930310 (PMC8756160; doi:10.1155/2022/2930310)
Supplement: Supplementary 9 — Table S1 The prognostic analyses for 23 m6A regulators in the LUAC cohorts using a univariate Cox regression model. [file 2930310.f9.txt]

id	HR	HR.95L	HR.95H	pvalue
METTL3	0.865101949	0.704398026	1.062469448	0.166959644
METTL16	1.026415752	0.800797052	1.315600866	0.836890163
WTAP	1.111909298	0.855660195	1.444898681	0.427387487
VIRMA	1.237555668	0.982985163	1.558054068	0.069691105
ZC3H13	0.992542442	0.808304661	1.218773744	0.943037914
RBM15	1.322233288	1.012252721	1.72713872	0.040431551
RBM15B	1.28495651	0.984139309	1.67772308	0.06540556
YTHDC1	0.936174626	0.701582124	1.249209323	0.654067882
YTHDC2	0.851716749	0.674406146	1.075644734	0.177762415
YTHDF1	0.897931994	0.695993482	1.158461804	0.407503282
YTHDF2	0.960628541	0.723475818	1.275519057	0.781261291
YTHDF3	1.171342749	0.930534706	1.474468203	0.178033104
HNRNPC	1.567484546	1.157511265	2.122664269	0.003666595
FMR1	0.938312481	0.749225428	1.175120703	0.579209623
LRPPRC	1.127859567	0.910285603	1.397437462	0.271178222
HNRNPA2B1	1.296039007	1.000749732	1.678458714	0.049339634
IGFBP2	0.959183892	0.896954017	1.025731222	0.22336409
IGFBP3	1.135610857	1.032768759	1.24869387	0.008647329
FTO	1.016530223	0.807895638	1.279043537	0.888751715
ALKBH5	1.129292217	0.858523881	1.485457703	0.384660503
