# Supplementary material for: Methylation Pattern Mediated by m6A Regulator and Tumor Microenvironment Invasion in Lung Adenocarcinoma
Source: Oxid Med Cell Longev. 2022 Jan 5;2022:2930310. doi: 10.1155/2022/2930310 (PMC8756160; doi:10.1155/2022/2930310)
Supplement: Supplementary 10 — Table S2 The prognostic analyses for DEGs using a univariate Cox regression model. [file 2930310.f10.txt]

id	HR	HR.95L	HR.95H	pvalue
PRKCA	1.187464315	1.046924902	1.346869766	0.007506547
TDRD7	1.274039099	1.022998933	1.586683595	0.030537848
CAST	1.257870787	1.041159026	1.519689957	0.017404447
RELL1	1.159573241	1.019338664	1.319100462	0.024372133
HRH1	1.225921514	1.031381373	1.457156003	0.020863507
PON2	1.168968456	1.021393087	1.337866165	0.02336685
IFIH1	1.163907937	1.014412609	1.33543459	0.030466015
FEZ2	1.280173868	1.005538563	1.62981828	0.04498498
TRIM6	1.297336318	1.145212367	1.469667609	4.30E-05
RALB	1.279223269	1.076923826	1.519524531	0.005051453
KRT80	1.192029671	1.078400912	1.317631247	0.000588847
NOL10	1.342857595	1.054956692	1.709327535	0.016642309
TLK1	1.300897123	1.015167294	1.667048707	0.037623597
POLR1A	1.284462586	1.043414426	1.581197359	0.018239145
POP1	1.246506485	1.019219068	1.524479346	0.031928221
